# Supplementary material for: Correlating nuclear morphometric patterns with estrogen receptor status in breast cancer pathologic specimens
Source: PubMed Central journal article supplement (PMC6123433; doi:10.1038/s41523-018-0084-4), 2018-09-04
Supplement: 41523_2018_84_MOESM1_ESM.pdf [file 41523_2018_84_MOESM1_ESM.pdf]

# Supplementary Figures

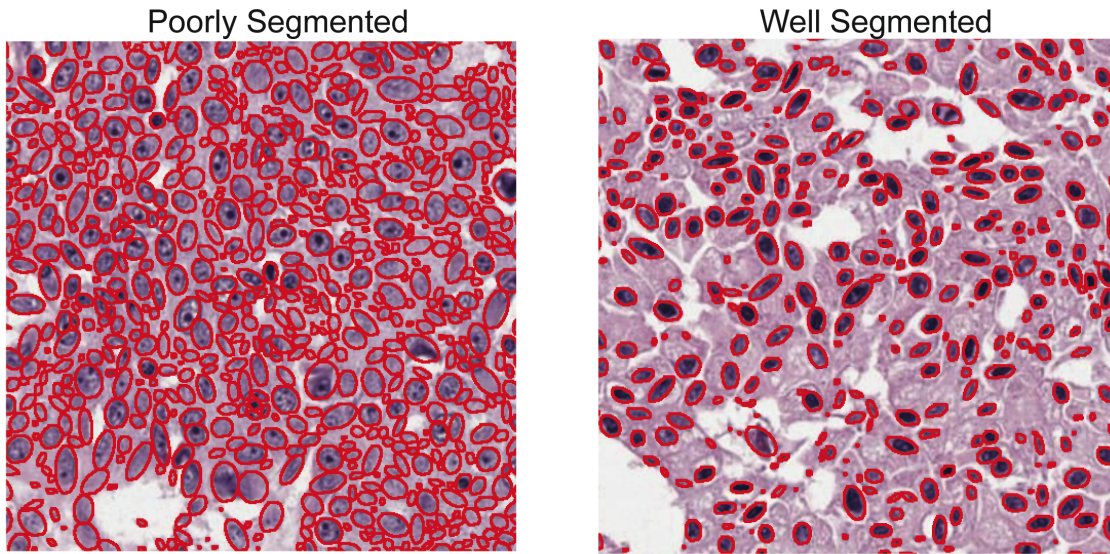

**Figure S1.** Exemplary over-segmented and well-segmented images. An image segmentation was deemed “well segmented” if it appeared to be more than 70% concordant.

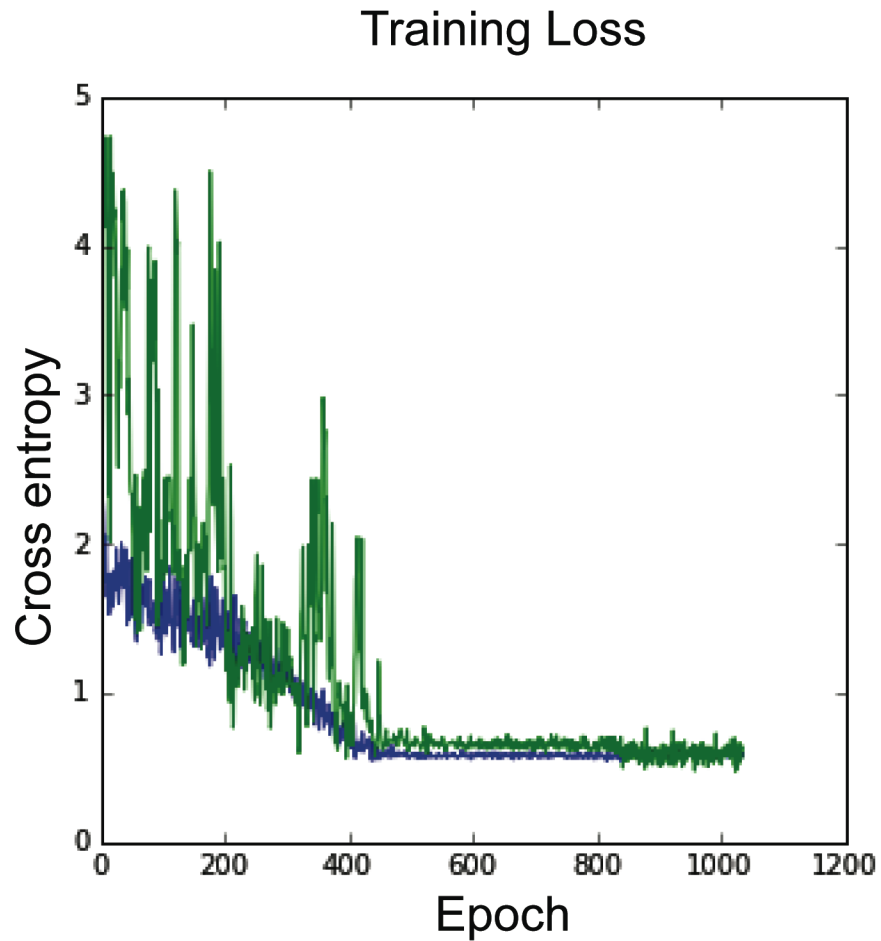

**Figure S2.** The neural network was trained using adadelta gradient descent with binary cross entropy loss. Initially, 20% of the training data were held-out for cross-validation during the training process (green) and 80% of the training data were used for training (blue). By epoch 825, the loss on the cross-validation data appeared to have converged. At this point, all training data were used to train and validate the model (green) for 200 additional epochs.

# Supplementary Code

# DESCRIPTION

Submission Code. This contains all the code necessary to obtain the results in the paper titled: "Correlating nuclear morphometric patterns with estrogen receptor status" by Rawat et. al.

## Imports

```
In [ ]: import os  
os.environ["CUDA_VISIBLE_DEVICES"]="1"  
filelist = []
```

```
In [2]: def frange(x):  
    return range(len(x))  
  
def arrayinarray(arr, InArray):  
    out = np.zeros(len(arr), bool)  
    for i in frange(arr):  
        if arr[i] in InArray:  
            out[i] = 1  
    return out
```

```
In [3]: from IPython.display import clear_output  
import os, sys, urllib, gzip
```

```
In [4]: import pickle  
sys.setrecursionlimit(10000)  
  
GPU = 1  
  
os.environ["THEANO_FLAGS"]='device=gpu0,mode=FAST_RUN,floatX=float32,nvc  
c.flags=-D_FORCE_INLINES'
```

```
In [5]: from theano import function, config, shared, sandbox  
import theano.tensor as T  
import numpy  
import time  
import matplotlib  
matplotlib.use('Agg') # Change matplotlib backend, in case we have no X  
server running..  
import matplotlib.pyplot as plt  
  
import numpy as np  
from IPython.display import Image as IPImage  
from PIL import Image  
from scipy.ndimage import imread  
import scipy
```

```

In [6]: import theano
print(theano.version.full_version)

import lasagne
print(lasagne.__version__)

from lasagne.layers import get_output, InputLayer, DenseLayer, Upscale2D
Layer, ReshapeLayer, DropoutLayer
from lasagne.nonlinearities import rectify, leaky_rectify, tanh
from lasagne.updates import nesterov_momentum
from lasagne.objectives import categorical_crossentropy
from nolearn.lasagne import NeuralNet, BatchIterator, PrintLayerInfo

from lasagne.layers import Conv2DLayer as Conv2DLayerSlow
from lasagne.layers import MaxPool2DLayer as MaxPool2DLayerSlow
try:
    from lasagne.layers.cuda_convnet import Conv2DCCLayer as Conv2DLayer
    Fast
    from lasagne.layers.cuda_convnet import MaxPool2DCCLayer as MaxPool2
    DLayerFast
    print('Using cuda_convnet (faster)')
except ImportError:
    from lasagne.layers import Conv2DLayer as Conv2DLayerFast
    from lasagne.layers import MaxPool2DLayer as MaxPool2DLayerFast
    print('Using lasagne.layers (slower)')

def SetDisplaySize(x,y):
    plt.rcParams['figure.figsize'] = (x, y)

def GPUtest():
    ## Segmentation Net
    vlen = 10 * 1 * 768 # 10 x #cores x # threads per core
    iters = 1000
    rng = numpy.random.RandomState(22)
    x = shared(numpy.asarray(rng.rand(vlen), config.floatX))
    f = function([], T.exp(x))
    print(f.maker.fgraph.toposort())
    t0 = time.time()
    for i in range(iters):
        r = f()
    t1 = time.time()
    print("Looping %d times took %f seconds" % (iters, t1 - t0))
    print("Result is %s" % (r,))
    if numpy.any([isinstance(x.op, T.Elemwise) for x in f.maker.fgraph.t
    oposort()]):
        print('Used the cpu')
    else:
        print('Used the gpu')

```

0.9.0.dev-RELEASE

0.2.dev1

Using lasagne.layers (slower)

In [7]: GPUtest()

```
[GpuElemwise{exp,no_inplace}<CudaNdarrayType(float32, vector)>, HostFromGpu(GpuElemwise{exp,no_inplace}.0)]  
Looping 1000 times took 0.059421 seconds  
Result is [ 1.23178029  1.61879349  1.52278066 ...,  2.34847188  2.3326  
757  1.0776093 ]  
Used the gpu
```

In [8]: **import sys**

```
from __future__ import print_function  
from matplotlib import pyplot as plt  
%matplotlib inline  
  
from PIL import Image  
import numpy as np  
from skimage.transform import rotate  
import numpy as np  
import pandas
```

In [9]: **from nolearn.lasagne.base import BatchIterator**  
**alpha = theano.shared(np.array(.001, "float32"))**

In [10]: **from matplotlib.mlab import csv2rec**  
**import lasagne.layers as layers**  
**import lasagne as L**  
  
**import Misc2**  
**from Misc2 import quickswap**  
**from Misc2 import quickswap as qs**  
  
**from sklearn.metrics import roc\_auc\_score**  
**from sklearn.metrics import roc\_auc\_score**  
  
**import Misc5**  
**reload(Misc5)**  
  
**from sklearn.metrics import roc\_curve, auc**  
  
**from sklearn.linear\_model import LogisticRegression**  
**from sklearn.discriminant\_analysis import QuadraticDiscriminantAnalysis**  
  
**from sklearn.decomposition import PCA**  
  
**from nolearn.lasagne.base import BatchIterator**  
  
**from sklearn.neighbors import KNeighborsClassifier**  
  
**from sklearn.cluster import KMeans**  
  
**from nolearn.lasagne.visualize import \***

```
In [11]: filelist+=["Misc2", "Misc5"]
```

```
In [12]: def shapepl(something):  
    return np.array(something.reshape((1,) + something.shape),"float32")  
  
def combinebycase(arr, caseid, fxn=np.max):  
    # caseid must be same len as array  
  
    if len(arr) != len(caseid): raise()  
    out = []  
    for c in np.unique(caseid):  
        vals = arr[caseid == c]  
        out.append(fxn(vals))  
    return np.array(out)
```

## Load Data

In the original implementation of this pipeline, we split the Biomax patients into 2 groups (discovery n=57/validation n=56). We also included a second validation set from a different source (Dong et. al. 2016), which contains images from DCIS. While our analysis showed that the neural net trained on the Biomax discovery set significantly predicted ER in both validation sets, we decided to focus on invasive ductal carcinoma in the paper. Hence, even though the code mentions the Dong dataset, we do not report any of these findings.

```
In [13]: metaBM140 = pandas.read_excel("Meta_BM140.xls")  
metaDong = pandas.read_excel("Meta_Dong.xls")
```

```
In [14]: rawDONG = pickle.load(open("DONG_processed_910.DATA", "r"))  
rawBM140 = pickle.load(open("bm140_processed_910.DATA", "r"))  
  
len(rawBM140[1]), len(rawDONG[1])
```

```
Out[14]: (140, 327)
```

```
In [15]: fnames = {}  
fnames["bm140"] = []  
fnames["dong"] = []
```

```
In [16]: for name in metaBM140["name"].values:  
    fnames["bm140"].append("./images/" + name + "_40x.png")
```

```
In [17]: for name in metaDong["name"].values:  
    fnames["dong"].append("./images/" + name + ".tif")
```

```
In [18]: [(i, feature) for i, feature in enumerate(rawDONG[0])]
```

```
Out[18]: [(0, 'row'),  
(1, 'col'),  
(2, 'width'),  
(3, 'height'),  
(4, 'angle_0'),  
(5, 'angle_1'),  
(6, 'angle_2'),  
(7, 'angle_3'),  
(8, 'angle_4'),  
(9, 'angle_5'),  
(10, 'maj_minor_ratio'),  
(11, 'area'),  
(12, 'peri'),  
(13, 'circ'),  
(14, 'gray_inten'),  
(15, 'gray_sd')]
```

```
In [19]: def Construct_Channels(rawData_item, scale = .25):  
    #if scale != .1:  
    #    print ("original scale is: 0.25 um per pixel. New scale is: %.1  
f um per pixel" % (.25 / scale))  
    r = np.array(rawData_item[:,0] * scale, int)  
    c = np.array(rawData_item[:,1] * scale, int)  
  
    OUT = np.zeros((np.max(r)+1,  
                    np.max(c)+1,  
                    rawData_item.shape[1] - 2 -2  
                    ))  
    for i in range(len(r)):  
        ## threshold: area > 100 is acceptable  
        if rawData_item[i, -5] > 100:  
            OUT[r[i], c[i]] = rawData_item[i, 2:-2]  
    return OUT  
  
CHANNELS_Dong = np.array([Construct_Channels(d) for d in rawDONG[1]])  
CHANNELS_BM140 = np.array([Construct_Channels(d) for d in rawBM140[1]])
```

```
In [20]: np.sum([np.sum(a[:, :, -5] > 0) for a in CHANNELS_Dong])
```

```
Out[20]: 17767
```

```
In [21]: from scipy.misc import imresize
```

```
In [22]: CHANNELS_BM140[0].shape
```

```
Out[22]: (486, 505, 12)
```



```
In [23]: SetDisplaySize(10,10)
rgb = imread(fnames["bm140"][0])
plt.imshow(imresize(CHANNELS_BM140[0][:,:,0]>0, (rgb.shape[0:2])))
plt.imshow(rgb, alpha=.25)
plt.savefig("overlay_nuclei_HE.png")
plt.clf()
clear_output()
```

<matplotlib.figure.Figure at 0x7f87220d2d90>

```
In [24]: import RRutils.utils
```

```
In [25]: patches_seg = RRutils.utils.makespacedsquares((CHANNELS_BM140[0:1], np.o
nes(1)), 32, 4)[0]

patches_rgb = RRutils.utils.makespacedsquares([rgb], np.ones(1)), 32*4*
2, 4)[0]
```

```
In [26]: SetDisplaySize(4,2)
plt.subplot(1,2,1).imshow(patches_seg[3][:,:,0]>0)
plt.subplot(1,2,2).imshow(patches_rgb[3])
```

Out[26]: <matplotlib.image.AxesImage at 0x7f84f0bb5710>

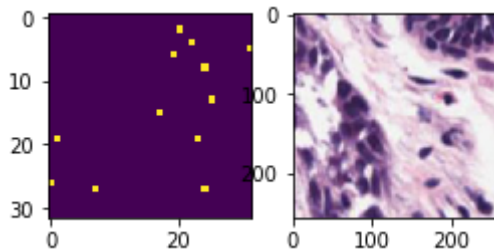

## Filter out small/poorly segmented images/ images lacking ground truth

```
In [27]: ## Dong Test Set - DCIS
Dong_valid = (metaDong.has_er_meas.values == True) & (metaDong.seg_ok.va
lues == True) & (metaDong.size_gt_52 == True)
X_Dong_er_test = CHANNELS_Dong[ Dong_valid ]
Y_Dong_er_test = metaDong.ERBOOL.values[ Dong_valid ]
PID_Dong_er_test = metaDong.PID.values[Dong_valid ]
name_Dong_er_test = metaDong.name.values[Dong_valid ]

print(np.unique(PID_Dong_er_test).shape)
```

(71,)

```
In [28]: ## BM ER Set (TOTAL DATASET)
X_BM_ER = CHANNELS_BM140[ metaBM140.Keep_ER.values]
Y_BM_ER = metaBM140.ERBOOL.values[ metaBM140.Keep_ER.values]
PID_BM_ER = metaBM140.PID.values[ metaBM140.Keep_ER.values]
name_BM_ER = metaBM140.name.values[ metaBM140.Keep_ER.values]

print(np.unique(PID_BM_ER).shape, "total patients in ER+/- set" )
print(X_BM_ER.shape, Y_BM_ER.shape, PID_BM_ER.shape)

(113,) total patients in ER+/- set
(113,) (113,) (113,)
```

```
In [29]: bm_er_fnames = metaBM140.name[metaBM140.Keep_ER.values == 1].values
```

```
In [30]: ## make a training/test BM set
```

```
In [31]: np.random.seed(42)
ran = np.random.permutation(113)

ntrain = 57

X_BM_ER_train = X_BM_ER[ran][:ntrain]
Y_BM_ER_train = Y_BM_ER[ran][:ntrain]
PID_BM_ER_train = PID_BM_ER[ran][:ntrain]
name_BM_ER_train = name_BM_ER[ran][:ntrain]

X_BM_ER_test = X_BM_ER[ran][ntrain:]
Y_BM_ER_test = Y_BM_ER[ran][ntrain:]
PID_BM_ER_test = PID_BM_ER[ran][ntrain:]
name_BM_ER_test = name_BM_ER[ran][ntrain:]
```

```
In [32]: len(bm_er_fnames)
```

```
Out[32]: 113
```

```
In [33]: bm_er_fnames[ran][:ntrain]
```

```
Out[33]: array(['u'H02', 'u'A05', 'u'D06', 'u'F12', 'u'A13', 'u'D13', 'u'F13', 'u'F09',
                'u'E01', 'u'A14', 'u'I12', 'u'C14', 'u'H09', 'u'J13', 'u'B09', 'u'A01',
                'u'G01', 'u'C04', 'u'H06', 'u'E09', 'u'J05', 'u'I04', 'u'B02', 'u'C09',
                'u'F10', 'u'J12', 'u'J09', 'u'B13', 'u'D11', 'u'J10', 'u'G13', 'u'B05',
                'u'C08', 'u'J04', 'u'A12', 'u'C11', 'u'F04', 'u'F08', 'u'C06', 'u'D08',
                'u'A06', 'u'E11', 'u'F07', 'u'D03', 'u'C13', 'u'B06', 'u'I14', 'u'C12',
                'u'E12', 'u'A09', 'u'D10', 'u'F11', 'u'H11', 'u'C05', 'u'B10', 'u'I03',
                'u'I08'], dtype=object)
```

```
In [34]: bm_er_fnames[ran][ntrain:]
```

```
Out[34]: array([u'C03', u'A11', u'H10', u'E04', u'B03', u'G14', u'C02', u'A04',  
              u'B07', u'D02', u'I06', u'A07', u'G02', u'I11', u'I01', u'E10',  
              u'E05', u'G05', u'D14', u'G08', u'F03', u'J11', u'H14', u'D07',  
              u'E14', u'E02', u'I09', u'E13', u'G04', u'C10', u'J06', u'F01',  
              u'F05', u'I07', u'D01', u'C07', u'I13', u'A02', u'E08', u'B12',  
              u'A03', u'C01', u'H13', u'J01', u'G03', u'H12', u'H07', u'J14',  
              u'B11', u'F02', u'F14', u'J07', u'B04', u'I05', u'E06', u'J03'],  
             dtype=object)
```

```
In [35]: for item in (Y_BM_ER_train, X_BM_ER_train, Y_BM_ER_test, X_BM_ER_test):  
         print (item.shape)  
         try: print(np.mean(item))  
         except: pass
```

```
(57,)  
0.701754385965  
(57,)  
(56,)  
0.732142857143  
(56,)
```

```
In [36]: [(i, feature) for i, feature in enumerate(rawDONG[0][2:-2])]
```

```
Out[36]: [(0, 'width'),  
          (1, 'height'),  
          (2, 'angle_0'),  
          (3, 'angle_1'),  
          (4, 'angle_2'),  
          (5, 'angle_3'),  
          (6, 'angle_4'),  
          (7, 'angle_5'),  
          (8, 'maj_minor_ratio'),  
          (9, 'area'),  
          (10, 'peri'),  
          (11, 'circ')]
```

**Display the 12 D vector**

```

In [37]: plt.gray()
SetDisplaySize(20,6)
plt.figure(facecolor='white')

for i, feature in enumerate(rawDONG[0]):
    if i in [0,1,14,15]:
        continue
    else:
        i -= 2

        sp = plt.subplot(2,6,i+1)
        sp.imshow(X_BM_ER_train[4][300:364,600:664,i] *10, cmap=plt.cm.g
ray )

        if sp == plt:
            plt.title("%s" % (feature))
            plt.gca().xaxis.set_major_locator(plt.NullLocator())
            plt.gca().yaxis.set_major_locator(plt.NullLocator())
        else:
            sp.set_title( "%s" % (feature) )
            sp.xaxis.set_major_locator(plt.NullLocator())
            sp.yaxis.set_major_locator(plt.NullLocator())

        #plt.show()
#plt.savefig("Illustration_of_12D_vector.png")
#plt.clf()
plt.show()      #

```

<matplotlib.figure.Figure at 0x7f8480f1e490>

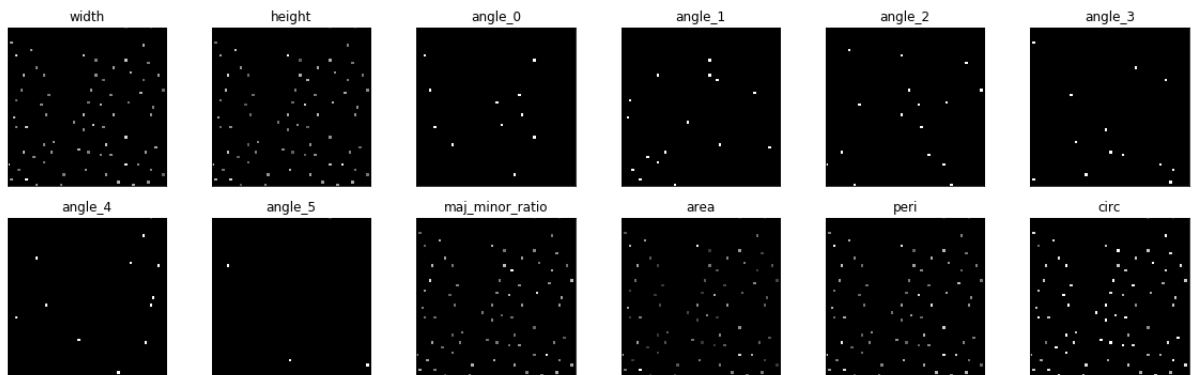

**define model**

```

In [38]: from lasagne.layers import ConcatLayer

np.random.seed(42)
nF = 32
nChan = 12
imagesize = None #401
Conv2DLayer = Conv2DLayerFast
nL = lasagne.nonlinearities.leaky_rectify
stride = theano.shared(np.array(1, int))
dropP = .5
nfilters = 8

CONTROL = 0
ROUND = 10
in1 = lasagne.layers.input.InputLayer(**{'name': 'base', 'shape': (None,
nChan, imagesize, imagesize) }) ## assume 41x41

if 1:
    padding = 20
    feature1 = []
    out1 = lasagne.layers.Pool2DLayer(in1, name="pool_0", mode= 'average
_exc_pad', stride=(1,1), pool_size=5) # size 37

    f1 = in1
    for q in range(5):
        f1 = Conv2DLayer(**{'name': 'C%.2i'%q, 'incoming':f1, 'filter_siz
e':3, 'num_filters': 16 * 2**q , 'pad':'same', 'nonlinearity':nL})
        f1 = MaxPool2DLayerFast(f1, pool_size=(2,2))

NFCNs = 512/2

out1 = Conv2DLayer(**{'incoming':f1, 'filter_size': 1, 'num_filters': NF
CNs, 'pad':'same', 'nonlinearity':nL, 'name':'FC-1'})
out1 = DropoutLayer(out1, p=.5)
out1 = DropoutLayer(out1, p=.5)
out1 = Conv2DLayer(**{'incoming':out1, 'filter_size': 1, 'num_filters':
1, 'pad':'same', 'nonlinearity':nL, 'name':'preds'})

GM_layer = lasagne.layers.GlobalPoolLayer(out1, pool_function=T.mean, na
me="globalmean_prob")
clf_layer = lasagne.layers.BatchNormLayer(GM_layer)
clf_layer = lasagne.layers.FlattenLayer(clf_layer)

```

```

In [39]: from lasagne.layers import Layer
def bce_sigmoid(pred, targ):
    pred = T.clip(pred, .001, .999)
    targ = T.clip(targ, .001, .999)
    return lasagne.objectives.binary_crossentropy(pred, targ)

```

**initialize**

```

In [40]: np.random.seed(42)

eval_size = .2

net_trip = NeuralNet(

    layers=clf_layer,
    max_epochs=1,
    batch_iterator_train=BatchIterator(1, shuffle=True), # shuffle on my
own
    update= lasagne.updates.adadelta,
    regression=True, # dont use crossentropy
    verbose=1,

    objective_loss_function = bce_sigmoid,

    eval_size=eval_size,
    objective_l2 = .00001,
)

net_trip.initialize()
PrintLayerInfo()(net_trip)

```

# Neural Network with 459955 learnable parameters

## Layer information

| #  | name            | size         |
|----|-----------------|--------------|
| 0  | base            | 12xNoneNone  |
| 1  | C00             | 16xNoneNone  |
| 2  |                 | 16xNoneNone  |
| 3  | C01             | 32xNoneNone  |
| 4  |                 | 32xNoneNone  |
| 5  | C02             | 64xNoneNone  |
| 6  |                 | 64xNoneNone  |
| 7  | C03             | 128xNoneNone |
| 8  |                 | 128xNoneNone |
| 9  | C04             | 256xNoneNone |
| 10 |                 | 256xNoneNone |
| 11 | FC-1            | 256xNoneNone |
| 12 |                 | 256xNoneNone |
| 13 |                 | 256xNoneNone |
| 14 | preds           | 1xNoneNone   |
| 15 | globalmean_prob | 1            |
| 16 |                 | 1            |
| 17 |                 | 1            |

**train the net**

```
In [41]: netname = "net_trip" # "net_trip"
         nettouse = eval(netname)
```

```
In [42]: nettouse.load_params_from("final_net_params_fulltrain.params")
```

```
Loaded parameters to layer 'C00' (shape 16x12x3x3).
Loaded parameters to layer 'C00' (shape 16).
Loaded parameters to layer 'C01' (shape 32x16x3x3).
Loaded parameters to layer 'C01' (shape 32).
Loaded parameters to layer 'C02' (shape 64x32x3x3).
Loaded parameters to layer 'C02' (shape 64).
Loaded parameters to layer 'C03' (shape 128x64x3x3).
Loaded parameters to layer 'C03' (shape 128).
Loaded parameters to layer 'C04' (shape 256x128x3x3).
Loaded parameters to layer 'C04' (shape 256).
Loaded parameters to layer 'FC-1' (shape 256x256x1x1).
Loaded parameters to layer 'FC-1' (shape 256).
Loaded parameters to layer 'preds' (shape 1x256x1x1).
Loaded parameters to layer 'preds' (shape 1).
Loaded parameters to layer 'batchnorm16' (shape 1).
```

In [43]: **raise()** **##** comment to train

```
SetDisplaySize(5,5)
#np.random.seed(42)

net_trip_mean = net_trip

paramfilename = '918%s.Round%i.params.3' % (netname, ROUND)
histfilename = '918%s.Round%i.hist' % (netname, ROUND)
if VERSION == -1:
    FOLD = 2
    batchsize = 228
    net_trip_mean.batch_iterator_train.batch_size = batchsize
    net_trip_mean.max_epochs = 1

    for BigEpoch in range(100): #30000

        alpha.set_value(100.1)

        if BigEpoch % 1 == 0:
            clear_output()

            trainloss = [item["train_loss"] for item in nettouse.train_h
istory_]
            validloss = [item["valid_loss"] for item in nettouse.train_h
istory_]

            plt.plot(trainloss[0:])
            plt.plot(validloss[0:])

            #plt.xlim(2000, 16000)
            #plt.ylim(0,.7)

            plt.show()
            nettouse.save_params_to(paramfilename)

            if 1:
                f = open(histfilename, "w")
                trainhist = str(net_trip_mean.train_history_)
                f.write(trainhist)
                f.close()
                pass

        size = 40

        x,y = Misc2.genData_boolean([X_BM_ER_train, Y_BM_ER_train], size
=100, fold=5)

        if 1:
            ## after 800 epochs
            ran1 = np.random.permutation(len(x))

            nettouse.fit(qs(x[ran1]), np.float32(y[ran1] == 0) )
```



```

        else:
            #print(net_trip.layers_[-1].b.get_value(), net_trip.layers_
[-1].W.get_value())
            #print(net_trip.layers_[-1].b.get_value(), net_trip.layers_
[-1].W.get_value())
            nettouse.fit(qs(x), np.float32(y==0) )

    print("done")

```

```

TypeErrorTraceback (most recent call last)
<ipython-input-43-746a72defc69> in <module>()
----> 1 raise()  ## comment to train
      2
      3
      4 SetDisplaySize(5,5)
      5 #np.random.seed(42)

```

TypeError: exceptions must be old-style classes or derived from BaseException, not tuple

## Assess the model's performance on "training" data

```

In [46]: phat1 = []
        F1_1 = []

        for i in frange(X_BM_ER_train):

            inp = shape1(X_BM_ER_train[i])
            #print(inp.shape)
            p = nettouse.predict_proba(qs(inp))
            phat1.append(p)

            f = net_trip.predict_proba(qs(inp))
            F1_1.append(f)

        phat1 = np.array(phat1).flatten()
        1 - roc_auc_score(Y_BM_ER_train, phat1.flatten())

```

Out[46]: 0.70147058823529407

```
In [47]: SetDisplaySize(3,3)
plt.scatter(Y_BM_ER_train, np.array(phat1).flatten(), color="black")
```

```
Out[47]: <matplotlib.collections.PathCollection at 0x7f84d9f4f750>
```

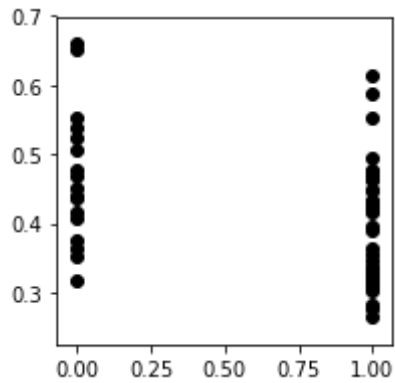

```
In [48]: import mahotas as mh
```

## Define some functions for visualization

In [49]: **from skimage import color**

```
def overlay2(big,small, thresh=.5 * 255, showmask = False, xmax=2500, ymax=3000):
```

```
    if 0:
        pass
    else:
```

```
        scaled = scipy.misc.imresize(small, (big.shape[0], big.shape[1]), interp="bicubic")
```

```
        scaled = scaled * small.max()
```

```
        scaled[0,0] = 0
```

```
        scaled[-1,-1] = 255
```

```
        print(small.max(), "smallmax", scaled.max())
```

```
    if showmask:
```

```
        plt.imshow(scaled)
```

```
        plt.show()
```

```
    print(scaled.shape)
```

```
    scaled = scaled[:min(big.shape[0], scaled.shape[0]), :min(big.shape[1], scaled.shape[1])]
```

```
    rgbout = big[:min(big.shape[0], scaled.shape[0]), :min(big.shape[1], scaled.shape[1]), :3]
```

```
    print(scaled.shape, rgbout.shape)
```

```
    grayout = color.gray2rgb(color.rgb2gray(rgbout)) * 255
```

```
    print(grayout.shape, scaled.shape)
```

```
    grayout = mh.overlay(grayout[:,:,:0], scaled > thresh)
```

```
    #grayout[scaled>thresh] = rgbout[scaled>thresh]
```

```
    if (xmax and ymax):
```

```
        plt.imshow(np.array(grayout, "uint8")[:xmax,:ymax])
```

```
    else:
```

```
        plt.imshow(np.array(grayout, "uint8"))
```

```
    #plt.hold(True)
```

```
    #plt.imshow(scaled, alpha=.5)
```

```
    #plt.show()
```

```
    return
```

```
def overlay3(big,small, thresh=.5 * 255, showmask = False):
```

```
    ""Alpha channel""
```

```
    print(big.shape)
```

```
    print(small.shape)
```

```
    scaled = scipy.misc.imresize(small, (big.shape[0], big.shape[1]), interp="bicubic") #> thresh
```

```
    scaled = np.uint8(scaled * small.max())
```

```
    scaled[0,0] = 0
```

```

scaled[-1,-1] = 255
#scaled = (1.00001 * scaled/scaled.max()) * 255

if showmask:
    plt.imshow(scaled)
    plt.show()

print(scaled.shape)
scaled = scaled[:min(big.shape[0], scaled.shape[0]), :min(big.shape[
1], scaled.shape[1])]
rgbout = big[:min(big.shape[0], scaled.shape[0]), :min(big.shape[1],
scaled.shape[1]), :3]

print(scaled.shape, rgbout.shape)
grayout = color.rgb2gray(rgbout)

#grayout[scaled>threshold] = rgbout[scaled>threshold]

alphad = np.dstack((rgbout, scaled))

#out = grayout * (1 - np.dstack((scaled, scaled, scaled))) + rgbout
* ( np.dstack((scaled, scaled, scaled)))

plt.imshow(grayout)
plt.hold(True)

plt.imshow(alphad, alpha=.9)

#plt.show()
#return np.array(out, "uint8")

```

```

In [50]: import pandas as pd

def Find_Optimal_Cutoff(target, predicted):
    """ Find the optimal probability cutoff point for a classification m
odel related to event rate
    Parameters
    -----
    target : Matrix with dependent or target data, where rows are observ
ations

    predicted : Matrix with predicted data, where rows are observations

    Returns
    -----
    list type, with optimal cutoff value

    """
    fpr, tpr, threshold = roc_curve(target, predicted)
    i = np.arange(len(tpr))
    roc = pd.DataFrame({'tf' : pd.Series(tpr-(1-fpr), index=i), 'thresho
ld' : pd.Series(threshold, index=i)})
    roc_t = roc.ix[(roc.tf-0).abs().argsort()[:1]]

    return list(roc_t['threshold'])[0]

```

```
In [51]: Find_Optimal_Cutoff(Y_BM_ER_train, phat1.flatten())
```

```
Out[51]: 0.43557891
```

## Test the Trained CLF on the (held-out) Biomax Test Set

These data were held out during training

```
In [52]: phat2 = []

for i in frange(X_BM_ER_test):

    inp = shapep1(X_BM_ER_test[i])
    #print(inp.shape)
    p = nettouse.predict_proba(qs(inp))
    phat2.append(p)

phat2 = np.array(phat2).flatten()
1 - roc_auc_score(Y_BM_ER_test, phat2.flatten())
```

```
Out[52]: 0.71869918699186996
```

```
In [53]: SetDisplaySize(3,3)

a = plt.scatter(Y_BM_ER_test, phat2.flatten(), color="black")
```

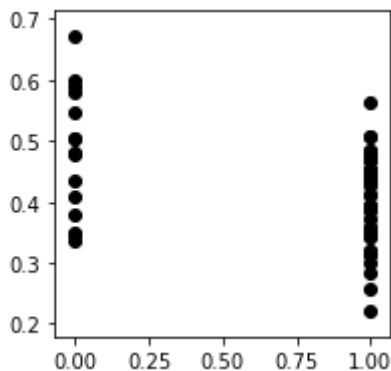

## Evaluate model on (held-out) DONG Dataset

Also held out during training

```
In [54]: predmaps_3 = []

phat3 = []
donger = X_Dong_er_test
dongerY = Y_Dong_er_test
for i in frange(donger):

    inp = shapep1(donger[i])
    p = netouse.predict_proba(qs(inp))
    phat3.append(p)

phat3 = np.array(phat3).flatten()
1 - roc_auc_score(dongerY, phat3)
```

Out[54]: 0.81492785793562705

```
In [55]: pid3 = PID_Dong_er_test
phat3_cs = combinebycase(phat3, pid3)

dongerY_cs = combinebycase(dongerY, pid3)
```

```
In [56]: name_Dong_er_cs = combinebycase(name_Dong_er_test, pid3)
```

```
In [57]: len(dongerY_cs), len(np.unique(name_Dong_er_cs))
```

Out[57]: (71, 71)

```
In [58]: SetDisplaySize(3,3)
a = plt.scatter(dongerY, phat3, color="black")
```

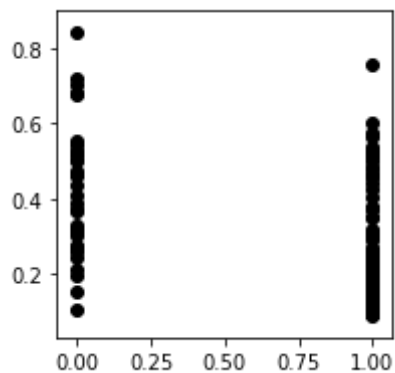

```
In [59]: SetDisplaySize(3,3)
a = plt.scatter(dongerY_cs, phat3_cs, color="black")
```

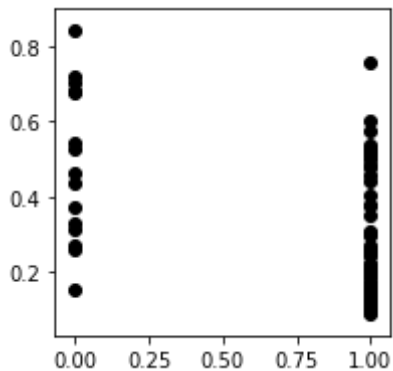

## What did it learn?

```
In [60]: def DensePredictor(image, title = None):
          sqs, nrow, ncol = RRutils.utils.makesubsquares(image, 32, (16,16))
          print (nrow,ncol)

          preds = net_trip.predict(np.array(quickswap(np.array(sqs)), "float32"))

          plt.imshow(preds.reshape(nrow, ncol) , interpolation="bicubic")
```

```
In [61]: DensePredictor(X_BM_ER_test[3])
```

31 52

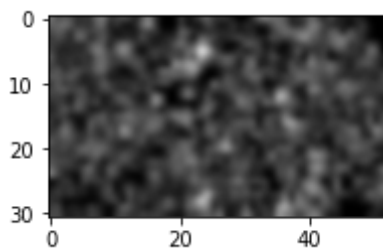

```

In [62]: from Misc2 import *
def genDatatandem(dataset, size=200, channels=3, fold=1, introtrate=0):
    sampleFold = 1 + introtrate * 4

    imageList = dataset[0] #list of images
    rgbimages = dataset[2]

    labels = [] #list of labels

    out = [] #output list of images
    rgbout = []

    #for fold_n in range(fold):
    for i in range(len(imageList)):

        dat2 = imageList[i]
        rgbresized = scipy.misc.imresize(rgbimages[i], (dat2.shape[0], d
at2.shape[1]) )

        #print(rgbresized.shape)
        for fold_n in range(fold):
            myseed = np.random.randint(0,100000)
            #print(myseed)
            label = dataset[1][i]
            if ((dat2.shape[0] < size) or (dat2.shape[1] < size)):
                continue

            np.random.seed(myseed)
            out += [np.array(flipAndRandom(dat2, size), 'float32') for _
i in range(sampleFold)] #####

            np.random.seed(myseed)
            rgbout += [np.array(flipAndRandom(rgbresized, size), 'float3
2') for _i in range(sampleFold)]

            labels += [label for _i in range(sampleFold)]

    out = np.array(out)
    #out = resizeX(out, shrinkfactor)
    return out, np.array(labels), rgbout

```

```

In [63]: bm_er_ims = []

for fname in bm_er_fnames:
    fpath = "./images/"+fname+"_40x.png"

    bm_er_ims.append(  scipy.misc.imresize(np.array(imread(fpath))[:, :, 0
:3] , .25 ) )

```

```

In [64]: bm_er_ims = np.array(bm_er_ims)

```



```
In [69]: np.random.seed(42)
samples, sample_gt, rgbsamples = genDatatandem([X_BM_ER, Y_BM_ER, bm_er_
ims], size=64, fold=100)

keep = np.array([s[:, :, 0].sum() > 0 for s in samples])
samples = samples[keep == 1]
rgbsamples = np.uint8(rgbsamples)[keep==1]
sample_gt = sample_gt[keep == 1]
```

```
In [70]: sample_preds = net_trip.predict(qs(samples)).flatten()
```

```
In [71]: SetDisplaySize(3,3)
print(sample_preds.shape, sample_preds.min(), sample_preds.max())
plt.hist(sample_preds)
```

```
(11161,) 0.0891686 1.07333
```

```
Out[71]: (array([ 811., 2206., 3326., 2520., 1364., 608., 226., 67.,
27., 6.]),
array([ 0.08916862, 0.18758512, 0.28600162, 0.38441812, 0.4828346
2,
0.58125112, 0.67966762, 0.77808412, 0.87650062, 0.9749171
2,
1.07333362])),
<a list of 10 Patch objects>)
```

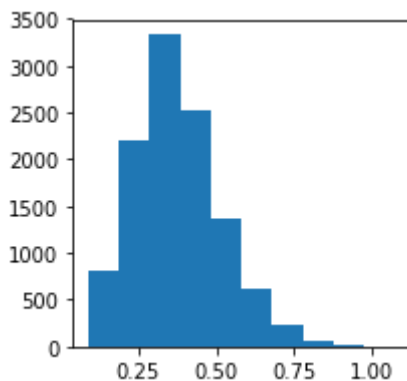

```
In [72]: sample_preds
```

```
Out[72]: array([ 0.43866351, 0.22833519, 0.36717215, ..., 0.50394499,
0.21490578, 0.35884726], dtype=float32)
```

```
In [73]: order = np.argsort(sample_preds)
```

```
In [74]: ## from low to high probability of ER
samples_ordered = samples[order]
sample_preds_ordered = sample_preds[order]

rgb_samples_ordered = rgbsamples[order]
```

```
In [75]: np.concatenate((np.ones(6), np.ones(1)))
```

```
Out[75]: array([ 1.,  1.,  1.,  1.,  1.,  1.,  1.])
```

```
In [76]: featindx = [0,1,-4,-3,-2,-1]
sixfeatnames = np.array(["width", "height", "mmr", "area", "peri", "circ"])
```

```
In [77]: print("only dealing with first 6 features")
```

```
def summarizesample(sample):
    """Summarizes a SINGLE SAMPLE"""
    # for each feature, provide a mean across # of cells, variation, total no of cells
    mask = sample[:, :, 0] != 0
    cells = sample[mask]

    ncells = np.sum(mask).reshape(-1)

    return np.hstack(( cells.mean(axis=0)[featindx], cells.var(axis=0)[featindx], ncells))
```

```
only dealing with first 6 features
```

### collect stats for each image in the dataset

first six features = mean of the 6 features,

next six: variance of the 6 features IN THE SAMPLE

last feature: n cells in the sample

```
In [79]: samplestats = np.array([summarizesample(s) for s in samples_ordered])
samplestats.shape
```

```
Out[79]: (11161, 13)
```

```
In [80]: samplestats_normed = samplestats / samplestats.max(axis=0)
```

```
In [81]: ## for each bracket get mean and 95% CI: store as list of lists: [ [mean, min95, max95], [mean, min95, max95] ..]
```

```
In [82]: import scikits.bootstrap as bootstrap
```

```

In [83]: ## Calculate MEANS
brackets = 15
intervals = samples_ordered.shape[0]/brackets

bracketmean = []
bracketci_lo = []
bracketci_hi = []

for i in range(brackets):
    bracket = samplestats_normed[i*intervals: (i+1) * intervals]

    m = []
    cilow = []
    cihigh = []

    for j in range(13): ## by feature
        data = bracket[:, j]
        m.append( data.mean() )
        ci = bootstrap.ci(data, np.mean )
        cilow.append(ci[0])
        cihigh.append(ci[1])
        bracketmean.append(m)
        bracketci_lo.append(cilow)
        bracketci_hi.append(cihigh)

## these will have the MEANS of the 13 things: eg. mean_bracket( mean_s
ample )
## these will be plotted as a line

#brackets are the CI of these features

## 15 rows = 15 quadrants, 13 columns = 13 features

```

```

In [84]: bracketci_hi = np.array(bracketci_hi)
bracketci_lo = np.array(bracketci_lo)
bracketmean = np.array(bracketmean)

```

```

In [85]: ## There are 15 brackets adn 13 features at each bracket (e.g. 13 lines
to plot)
bracketci_hi.shape, bracketmean.shape

```

```

Out[85]: ((15, 13), (15, 13))

```

```

In [87]: sixfeatnames2 = ('width', 'height', 'mmr', 'area', 'perimeter', 'circula
rity')

```

```
In [88]: SetDisplaySize(10,10)
```

```
for featurei in range(6):
    if featurei <6:
        line = plt.plot(np.arange(15), np.array(bracketmean)[: ,featurei
], label=sixfeatnames2[featurei] )[0]

        color = line.get_color()

        for x,y in zip(np.arange(15), np.array(bracketmean)[: ,featurei
]):
            yerr = .5 * (bracketci_hi[x, featurei] - bracketci_lo[x, fea
turei])
            plt.errorbar(x, y, xerr=0.0, yerr=yerr, c = color)

#legend = plt.legend(loc=(1.1,.5), shadow=True)
plt.yticks(plt.yticks()[0], fontsize=14)
plt.xticks(plt.xticks()[0], fontsize=14)
plt.title("Patch Mean", fontsize=20)
plt.ylabel("normalized value", fontsize=20)
plt.show()

for featurei in range(6, 13):
    if featurei <12:
        line = plt.plot(np.arange(15), np.array(bracketmean)[: ,featurei
], label=sixfeatnames2[featurei - 6] )[0]

        color = line.get_color()

        for x,y in zip(np.arange(15), np.array(bracketmean)[: ,featurei
]):
            yerr = .5 * (bracketci_hi[x, featurei] - bracketci_lo[x, fea
turei])
            plt.errorbar(x, y, xerr=0.0, yerr=yerr, c = color)

    else:
        plt.plot(np.array(bracketmean)[: ,featurei], 'k-', label="cellcou
nt")

        legend = plt.legend(loc=(1.1, .5), shadow=True, fontsize=20)
        plt.title("Patch Variance", fontsize=20)
        #for tick in plt.xticks():
        #    tick.label.set_fontsize(14)
        plt.yticks(plt.yticks()[0], fontsize=14)
        plt.xticks(plt.xticks()[0], fontsize=14)
        plt.show()

## Save predictions
predictions = np.vstack((

    np.vstack((np.array(["bm-train"]*len(phat1)),name_BM_ER_train, Y_BM_
ER_train, phat1)).T,
```

```
np.vstack((np.array(["bm-test"]*len(phat2)),name_BM_ER_test , Y_BM_ER_test,phat2)).T,  
np.vstack((np.array(["dong-test-image-level"]*len(phat3)),name_Dong_er_test, dongerY, phat3)).T,  
np.vstack((np.array(["dong-test-patient-level"]*len(phat3_cs)),name_Dong_er_cs, dongerY_cs, phat3_cs)).T  
  
    ))  
  
np.savetxt("predictions.csv", predictions, fmt="%s", delimiter=",")
```

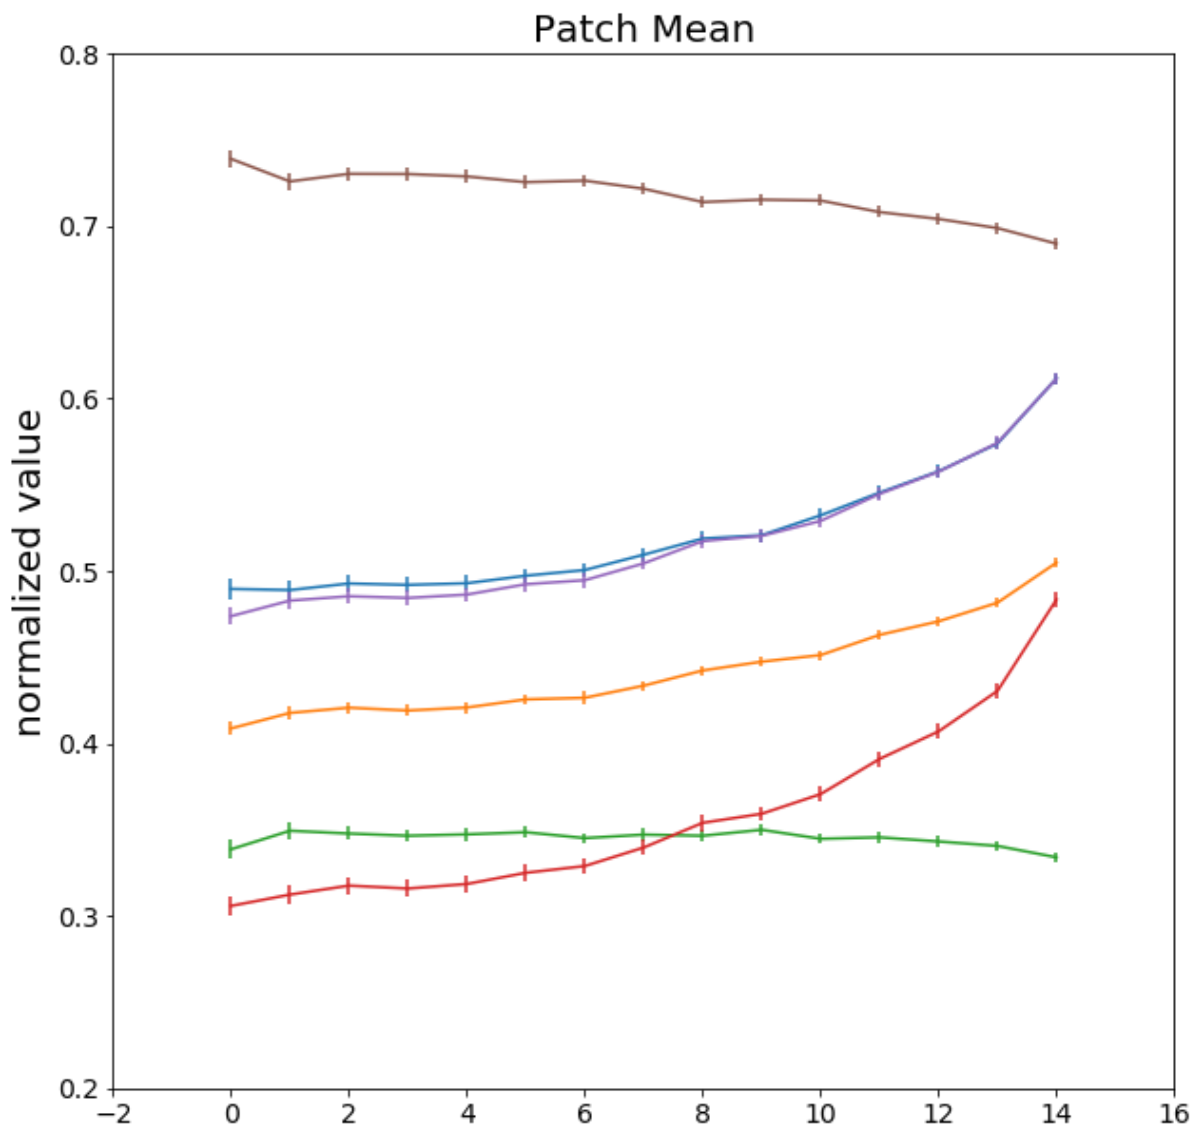

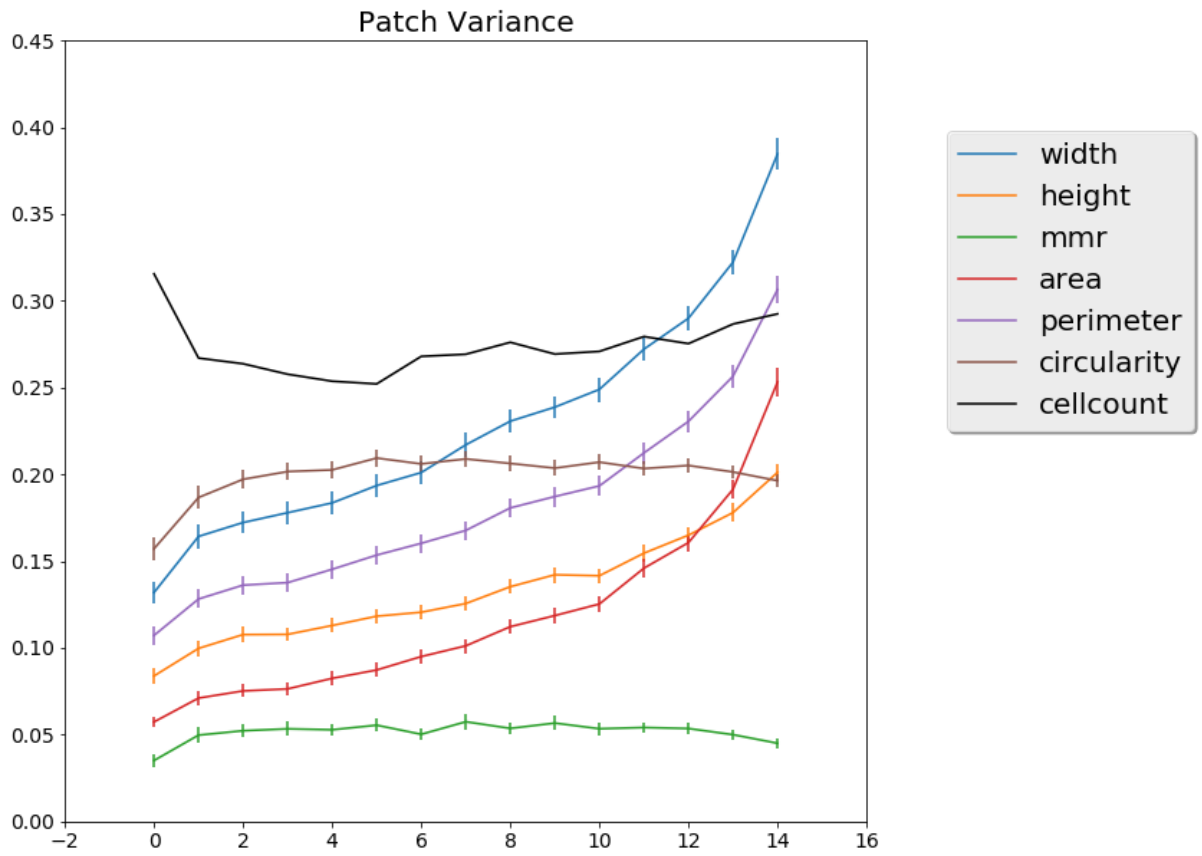

```
In [ ]: SetDisplaySize(10,10)
plt.figure(facecolor="white")
plot_loss(net_trip)
if 0:
    plt.savefig("trainingloss920.png")
```

```
### this script prints out the CI on the predictions outputted from
the network

preds = read.csv("predictions.csv",sep = ",")

unique(preds[,1])

library(pROC)

for (set in c("bm-test", "bm-train", "dong-test-image-level", "dong-
test-patient-level")) {

  print(set)

  valid = preds[,1] == set

  gt = preds[,3][valid]
  p = preds[,4][valid]

  #print(valid)
  print( ci(gt,p) )
  print(auc(gt,p))
}
```



# Predictions

| Position | Dataset  | ImageID | ER_status | Prediction | Grade | Used in study |
|----------|----------|---------|-----------|------------|-------|---------------|
| A1       | bm-train | A01     | 1         | 0.32406068 | 2     | 1             |
| A2       | bm-test  | A02     | 1         | 0.48345652 | 2     | 1             |
| A3       | bm-test  | A03     | 1         | 0.50572175 | 1.5   | 1             |
| A4       | bm-test  | A04     | 1         | 0.4118703  | 2     | 1             |
| A5       | bm-train | A05     | 0         | 0.41702446 | 2     | 1             |
| A6       | bm-train | A06     | 1         | 0.44889027 | 1.5   | 1             |
| A7       | bm-test  | A07     | 1         | 0.37199688 | 1.5   | 1             |
| A9       | bm-train | A09     | 1         | 0.47320604 | 1.5   | 1             |
| A11      | bm-test  | A11     | 0         | 0.34952173 | 2     | 1             |
| A12      | bm-train | A12     | 1         | 0.34588736 | 2     | 1             |
| A13      | bm-train | A13     | 0         | 0.43557891 | 2     | 1             |
| A14      | bm-train | A14     | 0         | 0.65930474 | 1     | 1             |
| B2       | bm-train | B02     | 1         | 0.30883408 | 2     | 1             |
| B3       | bm-test  | B03     | 1         | 0.43276647 | 2.5   | 1             |
| B4       | bm-test  | B04     | 0         | 0.48161587 | 2     | 1             |
| B5       | bm-train | B05     | 1         | 0.43380895 | 2     | 1             |
| B6       | bm-train | B06     | 1         | 0.31727934 | 2     | 1             |
| B7       | bm-test  | B07     | 0         | 0.41005701 | 2     | 1             |
| B9       | bm-train | B09     | 0         | 0.37628028 | 1.5   | 1             |
| B10      | bm-train | B10     | 0         | 0.55321419 | 2     | 1             |
| B11      | bm-test  | B11     | 0         | 0.34523419 | 2     | 1             |
| B12      | bm-test  | B12     | 1         | 0.22134452 | 1.5   | 1             |
| B13      | bm-train | B13     | 0         | 0.40693051 | 2     | 1             |
| C1       | bm-test  | C01     | 1         | 0.38599506 | 2     | 1             |
| C2       | bm-test  | C02     | 1         | 0.35155219 | 2     | 1             |
| C3       | bm-test  | C03     | 1         | 0.34233952 | 1     | 1             |
| C4       | bm-train | C04     | 1         | 0.27590972 | 1.5   | 1             |
| C5       | bm-train | C05     | 1         | 0.3144159  | 1.5   | 1             |
| C6       | bm-train | C06     | 1         | 0.42752177 | 2     | 1             |
| C7       | bm-test  | C07     | 1         | 0.39096004 | 1.5   | 1             |
| C8       | bm-train | C08     | 1         | 0.32917869 | 2     | 1             |
| C9       | bm-train | C09     | 1         | 0.3030932  | 1.5   | 1             |
| C10      | bm-test  | C10     | 0         | 0.43541142 | 1.5   | 1             |
| C11      | bm-train | C11     | 1         | 0.35646942 | 2     | 1             |
| C12      | bm-train | C12     | 0         | 0.36276385 | 2     | 1             |
| C13      | bm-train | C13     | 1         | 0.47666729 | 1     | 1             |
| C14      | bm-train | C14     | 1         | 0.33144116 | 1     | 1             |
| D1       | bm-test  | D01     | 1         | 0.31930378 | 1     | 1             |
| D2       | bm-test  | D02     | 1         | 0.45073405 | 2     | 1             |
| D3       | bm-train | D03     | 1         | 0.42285973 | 2     | 1             |

|     |          |     |   |            |     |   |
|-----|----------|-----|---|------------|-----|---|
| D6  | bm-train | D06 | 1 | 0.42172593 | 2   | 1 |
| D7  | bm-test  | D07 | 1 | 0.29921189 | 2   | 1 |
| D8  | bm-train | D08 | 1 | 0.33410677 | 1   | 1 |
| D10 | bm-train | D10 | 0 | 0.46991271 | 1   | 1 |
| D11 | bm-train | D11 | 0 | 0.50539565 | 1.5 | 1 |
| D13 | bm-train | D13 | 1 | 0.47578496 | 1.5 | 1 |
| D14 | bm-test  | D14 | 0 | 0.5890581  | 1.5 | 1 |
| E1  | bm-train | E01 | 0 | 0.451013   | 1.5 | 1 |
| E2  | bm-test  | E02 | 0 | 0.50443363 | 2   | 1 |
| E4  | bm-test  | E04 | 1 | 0.31623808 | 2   | 1 |
| E5  | bm-test  | E05 | 1 | 0.25779769 | 2   | 1 |
| E6  | bm-test  | E06 | 1 | 0.2841965  | 1   | 1 |
| E8  | bm-test  | E08 | 1 | 0.43871439 | 2   | 1 |
| E9  | bm-train | E09 | 1 | 0.61303037 | 1.5 | 1 |
| E10 | bm-test  | E10 | 1 | 0.3141036  | 2   | 1 |
| E11 | bm-train | E11 | 1 | 0.49475098 | 2   | 1 |
| E12 | bm-train | E12 | 1 | 0.33820877 | 2   | 1 |
| E13 | bm-test  | E13 | 1 | 0.43857884 | 2.5 | 1 |
| E14 | bm-test  | E14 | 1 | 0.4493506  | 2   | 1 |
| F1  | bm-test  | F01 | 1 | 0.46988118 | 2   | 1 |
| F2  | bm-test  | F02 | 1 | 0.34868679 | 1.5 | 1 |
| F3  | bm-test  | F03 | 1 | 0.3209745  | 1.5 | 1 |
| F4  | bm-train | F04 | 1 | 0.33073846 | 2   | 1 |
| F5  | bm-test  | F05 | 0 | 0.59927523 | 2   | 1 |
| F7  | bm-train | F07 | 1 | 0.28386176 | 2   | 1 |
| F8  | bm-train | F08 | 1 | 0.26523137 | 2.5 | 1 |
| F9  | bm-train | F09 | 1 | 0.39753431 | 2   | 1 |
| F10 | bm-train | F10 | 1 | 0.4494133  | 2   | 1 |
| F11 | bm-train | F11 | 0 | 0.52353615 | 2   | 1 |
| F12 | bm-train | F12 | 1 | 0.46268475 | 2   | 1 |
| F13 | bm-train | F13 | 1 | 0.46502808 | 2   | 1 |
| F14 | bm-test  | F14 | 1 | 0.34902862 | 1.5 | 1 |
| G1  | bm-train | G01 | 0 | 0.35349941 | 2   | 1 |
| G2  | bm-test  | G02 | 1 | 0.47178266 | 2   | 1 |
| G3  | bm-test  | G03 | 0 | 0.37860858 | 2   | 1 |
| G4  | bm-test  | G04 | 1 | 0.36001387 | 3   | 1 |
| G5  | bm-test  | G05 | 1 | 0.34992132 | 2   | 1 |
| G8  | bm-test  | G08 | 1 | 0.48323873 | 2   | 1 |
| G13 | bm-train | G13 | 1 | 0.58676285 | 2   | 1 |
| G14 | bm-test  | G14 | 1 | 0.56484234 | 2   | 1 |
| H2  | bm-train | H02 | 1 | 0.43237412 | 2.5 | 1 |
| H6  | bm-train | H06 | 0 | 0.47654739 | 2   | 1 |

|     |          |     |   |            |     |   |
|-----|----------|-----|---|------------|-----|---|
| H7  | bm-test  | H07 | 1 | 0.34227702 | 2   | 1 |
| H9  | bm-train | H09 | 0 | 0.31646851 | 2   | 1 |
| H10 | bm-test  | H10 | 0 | 0.67290008 | 2   | 1 |
| H11 | bm-train | H11 | 0 | 0.43840089 | 1.5 | 1 |
| H12 | bm-test  | H12 | 1 | 0.42841291 | 2   | 1 |
| H13 | bm-test  | H13 | 1 | 0.4325819  | 2   | 1 |
| H14 | bm-test  | H14 | 1 | 0.42672214 | 2   | 1 |
| I1  | bm-test  | I01 | 0 | 0.50265795 | 2   | 1 |
| I3  | bm-train | I03 | 1 | 0.47241309 | 2   | 1 |
| I4  | bm-train | I04 | 1 | 0.3911947  | 2   | 1 |
| I5  | bm-test  | I05 | 1 | 0.50575948 | 1.5 | 1 |
| I6  | bm-test  | I06 | 1 | 0.39444658 | 2   | 1 |
| I7  | bm-test  | I07 | 1 | 0.41271818 | 2   | 1 |
| I8  | bm-train | I08 | 1 | 0.41984674 | 2   | 1 |
| I9  | bm-test  | I09 | 1 | 0.46695069 | 2   | 1 |
| I11 | bm-test  | I11 | 1 | 0.47713417 | 2   | 1 |
| I12 | bm-train | I12 | 1 | 0.31550247 | 2   | 1 |
| I13 | bm-test  | I13 | 0 | 0.58113855 | 2   | 1 |
| I14 | bm-train | I14 | 1 | 0.3111777  | 2   | 1 |
| J1  | bm-test  | J01 | 0 | 0.33670238 | 2   | 1 |
| J3  | bm-test  | J03 | 1 | 0.45433289 | 2   | 1 |
| J4  | bm-train | J04 | 1 | 0.36456752 | 2   | 1 |
| J5  | bm-train | J05 | 0 | 0.65112031 | 2   | 1 |
| J6  | bm-test  | J06 | 0 | 0.47777674 | 2   | 1 |
| J7  | bm-test  | J07 | 1 | 0.47147557 | 2   | 1 |
| J9  | bm-train | J09 | 1 | 0.41671023 | 2   | 1 |
| J10 | bm-train | J10 | 0 | 0.5385474  | 2   | 1 |
| J11 | bm-test  | J11 | 0 | 0.546125   | 2   | 1 |
| J12 | bm-train | J12 | 1 | 0.55379772 | 2   | 1 |
| J13 | bm-train | J13 | 1 | 0.47003463 | 2   | 1 |
| J14 | bm-test  | J14 | 1 | 0.44989935 | 2   | 1 |
| A10 |          |     |   |            | 1   | 0 |
| B14 |          |     |   |            | 1   | 0 |
| D4  |          |     |   |            | 1   | 0 |
| F6  |          |     |   |            | 1   | 0 |
| H4  |          |     |   |            | 1.5 | 0 |
| A8  |          |     |   |            | 2   | 0 |
| B8  |          |     |   |            | 2   | 0 |
| D5  |          |     |   |            | 2   | 0 |
| D9  |          |     |   |            | 2   | 0 |
| D12 |          |     |   |            | 2   | 0 |
| E3  |          |     |   |            | 2   | 0 |

|     |     |   |
|-----|-----|---|
| E7  | 2   | 0 |
| G6  | 2   | 0 |
| G7  | 2   | 0 |
| G9  | 2   | 0 |
| G11 | 2   | 0 |
| G12 | 2   | 0 |
| H1  | 2   | 0 |
| I2  | 2   | 0 |
| I10 | 2   | 0 |
| J8  | 2   | 0 |
| B1  | 2.5 | 0 |
| G10 | 2.5 | 0 |
| H8  | 2.5 | 0 |
| H3  |     |   |
| H5  |     |   |
| J2  |     |   |
